# Supplementary material for: TIMP3 and TIMP1 are risk genes for bicuspid aortic valve and aortopathy in Turner syndrome
Source: PubMed Central journal article supplement (PMC6188895; doi:10.1371/journal.pgen.1007692), 2018-10-03
Supplement: pgen.1007692.s006.pdf [file pgen.1007692.s006.pdf]

S1 Table. Genes on Xp ranked according to potential to be involved in aortopathy

| gene     | ensembl         | cdsStart - cdsEnd*  | strand | X inactivation status | aorta expression (GTEX median RPKM) | Pseudogene/ Y homolog | meets criteria | rank | reference                 |
|----------|-----------------|---------------------|--------|-----------------------|-------------------------------------|-----------------------|----------------|------|---------------------------|
| TIMP1    | ENSG00000102265 | X:47442814-47446090 | +      | VE                    | 423.6                               | -                     | yes            | 1    | Balaton et al. 2015       |
| RBM3     | ENSG00000102317 | X:48433568-48435474 | +      | VE                    | 48.96                               | -                     | yes            | 2    | Wainer-Katsir et al. 2016 |
| UBA1     | ENSG00000130985 | X:47058201-47074328 | +      | E                     | 41.44                               | -                     | yes            | 3    | Balaton et al. 2015       |
| INE2     | ENSG00000281371 | X:15805712-15805712 | -      | E                     | 12.36                               | -                     | yes            | 4    | Esposito et al. 1997      |
| AP1S2    | ENSG00000182287 | X:15845447-15870647 | -      | Mostly E              | 8.701                               | -                     | yes            | 5    | Balaton et al. 2015       |
| GEMIN8   | ENSG00000046647 | X:14027031-14039597 | -      | Mostly E              | 6.69                                | -                     | yes            | 6    | Balaton et al. 2015       |
| CA5B     | ENSG00000169239 | X:15768146-15800787 | +      | VE                    | 5.198                               | -                     | yes            | 7    | Peeters et al. 2014       |
| NHS      | ENSG00000188158 | X:17653686-17750584 | +      | Mostly VE             | 4.852                               | -                     | yes            | 8    | Balaton et al. 2015       |
| TRAPPC2  | ENSG00000196459 | X:13732525-13738082 | -      | Mostly E              | 4.289                               | -                     | yes            | 9    | Balaton et al. 2015       |
| CA5BP1   | ENSG00000186312 | X:15721474-15721474 | +      | E                     | 3.813                               | -                     | yes            | 10   | Balaton et al. 2015       |
| CTPS2    | ENSG00000047230 | X:16608915-16721025 | -      | Mostly E              | 3.593                               | -                     | yes            | 11   | Balaton et al. 2015       |
| INE1     | ENSG00000224975 | X:47065254-47065254 | +      | E                     | 2.09                                | -                     | yes            | 12   | Balaton et al. 2015       |
| TCEANC   | ENSG00000176896 | X:13680627-13681683 | +      | Mostly E              | 0.4852                              | -                     | yes            | 13   | Balaton et al. 2015       |
| PPEF1    | ENSG00000086717 | X:18725899-18845605 | +      | VE                    | 0.05353                             | -                     | yes            | 14   | Balaton et al. 2015       |
| GRPR     | ENSG00000126010 | X:16142076-16170768 | +      | Mostly VE             | 0.02957                             | -                     | yes            | 15   | Balaton et al. 2015       |
| FAM9C    | ENSG00000187268 | X:13056559-13061908 | -      | E                     | 0.005627                            | -                     | yes            | 16   | Balaton et al. 2015       |
| KRBOX4   | ENSG00000147121 | X:46309895-46332447 | +      | No call               | 3.478                               | -                     | yes            | -    | na                        |
| BMX      | ENSG00000102010 | X:15526476-15574270 | +      | No call               | 2.041                               | -                     | yes            | -    | Balaton et al. 2015       |
| USP27X   | ENSG00000242013 | X:49644910-49646227 | +      | No call               | 1.952                               | -                     | yes            | -    | Balaton et al. 2015       |
| FAM156B  | ENSG00000179304 | X:52936252-52936894 | +      | No call               | 0.7911                              | -                     | yes            | -    | Balaton et al. 2015       |
| NDP      | ENSG00000124479 | X:43809044-43817891 | -      | No call               | 0.137                               | -                     | yes            | -    | Balaton et al. 2015       |
| ERAS     | ENSG00000187682 | X:48687533-48688235 | +      | No call               | 0.08968                             | -                     | yes            | -    | Balaton et al. 2015       |
| GPR82    | ENSG00000171657 | X:41586279-41587290 | +      | No call               | 0.07618                             | -                     | yes            | -    | Balaton et al. 2015       |
| PAGE2B   | ENSG00000238269 | X:55102474-55105231 | +      | No call               | 0.07481                             | -                     | yes            | -    | Balaton et al. 2015       |
| KLHL34   | ENSG00000185915 | X:21673971-21675906 | -      | No call               | 0.02192                             | -                     | yes            | -    | Balaton et al. 2015       |
| ALAS2    | ENSG00000158578 | X:55035612-55054240 | -      | I                     | 0.1066                              | Y pseudogene          | no             | -    | Balaton et al. 2015       |
| GPKOW    | ENSG00000068394 | X:48970558-48980072 | -      | Mostly I              | 13.43                               | -                     | no             | -    | Balaton et al. 2015       |
| GPM6B    | ENSG00000046653 | X:13792662-13956629 | -      | Mostly E              | 3.678                               | Y pseudogene          | no             | -    | Balaton et al. 2015       |
| GPR143   | ENSG00000101850 | X:9693785-9733857   | -      | Mostly I              | 0.0387                              | Y pseudogene          | no             | -    | Balaton et al. 2015       |
| GPR173   | ENSG00000184194 | X:53105803-53106925 | +      | Mostly I              | 2.854                               | Y pseudogene          | no             | -    | Balaton et al. 2015       |
| GPR34    | ENSG00000171659 | X:41554886-41556032 | +      | I                     | 3.703                               | Y pseudogene          | no             | -    | Balaton et al. 2015       |
| GRIPAP1  | ENSG00000068400 | X:48830604-48858640 | -      | I                     | 9.056                               | Y pseudogene          | no             | -    | Balaton et al. 2015       |
| GSPT2    | ENSG00000189369 | X:51486722-51488609 | +      | I                     | 2.974                               | Y pseudogene          | no             | -    | Balaton et al. 2015       |
| GYG2     | ENSG00000056998 | X:2748229-2799254   | +      | Mostly E              | 0.6903                              | Y pseudogene          | no             | -    | Balaton et al. 2015       |
| AMELX    | ENSG00000125363 | X:11312908-11318732 | +      | No call               | 0                                   | Y homolog             | no             | -    | Balaton et al. 2015       |
| HCCS     | ENSG00000004961 | X:11130180-11139930 | +      | I                     | 5.128                               | -                     | no             | -    | Balaton et al. 2015       |
| HDAC6    | ENSG00000094631 | X:48660339-48683022 | +      | Mostly I              | 14.55                               | -                     | no             | -    | Balaton et al. 2015       |
| HSD17B10 | ENSG00000072506 | X:53458351-53461292 | -      | Mostly I              | 41.21                               | -                     | no             | -    | Balaton et al. 2015       |
| HUWE1    | ENSG00000086758 | X:53560269-53681051 | -      | Mostly I              | 13.56                               | Y pseudogene          | no             | -    | Balaton et al. 2015       |
| IL1RAPL1 | ENSG00000169306 | X:28807460-29973937 | +      | Discordant            | 0.00543                             | -                     | no             | -    | Balaton et al. 2015       |
| IQSEC2   | ENSG00000124313 | X:53263400-53350321 | -      | Mostly E              | 3.511                               | Y pseudogene          | no             | -    | Balaton et al. 2015       |
| ITIH6    | ENSG00000102313 | X:54776327-54824643 | -      | No call               | 0                                   | Y pseudogene          | no             | -    | Balaton et al. 2015       |
| KCND1    | ENSG00000102057 | X:48819841-48826678 | -      | Mostly I              | 1.774                               | Y pseudogene          | no             | -    | Balaton et al. 2015       |
| KDM5C    | ENSG00000126012 | X:53221925-53254071 | -      | Mostly E              | 14.17                               | Y homolog             | no             | -    | Balaton et al. 2015       |
| KDM6A    | ENSG00000147050 | X:44732797-44970656 | +      | Mostly E              | 3.678                               | Y homolog             | no             | -    | Balaton et al. 2015       |
| KLF8     | ENSG00000102349 | X:56259767-56310761 | +      | I                     | 4.441                               | -                     | no             | -    | Balaton et al. 2015       |
| KLHL15   | ENSG00000174010 | X:24006037-24024810 | -      | I                     | 1.847                               | Y pseudogene          | no             | -    | Balaton et al. 2015       |
| LANCL3   | ENSG00000147036 | X:37431123-37535066 | +      | Mostly I              | 0.2512                              | Y pseudogene          | no             | -    | Balaton et al. 2015       |
| MAGEB1   | ENSG00000214107 | X:30268610-30269654 | +      | No call               | 0                                   | pseudogene            | no             | -    | Balaton et al. 2015       |
| MAGEB10  | ENSG00000177689 | X:27839423-27840467 | +      | No call               | 0                                   | pseudogene            | no             | -    | Balaton et al. 2015       |
| MAGEB16  | ENSG00000189023 | X:35820313-35821288 | +      | No call               | 0                                   | pseudogene            | no             | -    | Balaton et al. 2015       |
| MAGEB18  | ENSG00000176774 | X:26157102-26158134 | +      | No call               | 0                                   | pseudogene            | no             | -    | Balaton et al. 2015       |
| APEX2    | ENSG00000169188 | X:55029485-55033868 | +      | I                     | 5.31                                | Y pseudogene          | no             | -    | Balaton et al. 2015       |
| MAGEB2   | ENSG00000099399 | X:30236697-30237657 | +      | No call               | 0                                   | pseudogene            | no             | -    | Balaton et al. 2015       |
| MAGEB4   | ENSG00000120289 | X:30260252-30261293 | +      | No call               | 0                                   | pseudogene            | no             | -    | Balaton et al. 2015       |
| MAGED1   | ENSG00000179222 | X:51637400-51645026 | +      | I                     | 23.63                               | pseudogene            | no             | -    | Balaton et al. 2015       |
| MAGED2   | ENSG00000102316 | X:54835764-54842115 | +      | Mostly I              | 99                                  | pseudogene            | no             | -    | Balaton et al. 2015       |
| MAGED4   | ENSG00000154545 | X:51805325-51811268 | -      | No call               | 0                                   | pseudogene            | no             | -    | Balaton et al. 2015       |
| MAGED4B  | ENSG00000187243 | X:51805124-51811268 | -      | No call               | 0                                   | pseudogene            | no             | -    | Balaton et al. 2015       |
| MAGEH1   | ENSG00000187601 | X:55478807-55479467 | +      | I                     | 26.74                               | pseudogene            | no             | -    | Balaton et al. 2015       |
| MAGIX    | ENSG00000017621 | X:49019227-49022738 | +      | Mostly I              | 0.8064                              | -                     | no             | -    | Balaton et al. 2015       |
| MAOA     | ENSG00000189221 | X:43515589-43603760 | +      | Mostly I              | 27.46                               | -                     | no             | -    | Balaton et al. 2015       |
| MAOB     | ENSG00000069535 | X:43626712-43741545 | -      | I                     | 40.03                               | Y pseudogene          | no             | -    | Balaton et al. 2015       |
| APOO     | ENSG00000184831 | X:23858458-23925819 | -      | I                     | 2.997                               | Y pseudogene          | no             | -    | Balaton et al. 2015       |
| MAP3K15  | ENSG00000180815 | X:19378866-19533379 | -      | Mostly I              | 0.02838                             | Y pseudogene          | no             | -    | Balaton et al. 2015       |
| MAP7D2   | ENSG00000184368 | X:20028920-20134997 | -      | Discordant            | 0.04491                             | -                     | no             | -    | Balaton et al. 2015       |
| MBTPS2   | ENSG00000012174 | X:21857852-21900773 | +      | I                     | 2.398                               | -                     | no             | -    | Balaton et al. 2015       |
| MED14    | ENSG00000180182 | X:40511057-40594664 | -      | VE                    | 5.1                                 | Y pseudogene          | no             | -    | Balaton et al. 2015       |
| MID1     | ENSG00000101871 | X:10417407-10535587 | -      | Mostly I              | 4.311                               | Y pseudogene          | no             | -    | Balaton et al. 2015       |
| MID1IP1  | ENSG00000165175 | X:38664199-38664751 | +      | I                     | 15.32                               | -                     | no             | -    | Balaton et al. 2015       |
| MOSPD2   | ENSG00000130150 | X:14910954-14937931 | +      | I                     | 3.298                               | -                     | no             | -    | Balaton et al. 2015       |
| MSL3     | ENSG00000005302 | X:11776826-11793198 | +      | Discordant            | 5.731                               | -                     | no             | -    | Balaton et al. 2015       |
| MXRA5    | ENSG00000101825 | X:3227756-3261874   | -      | Mostly E              | 1.064                               | Y pseudogene          | no             | -    | Balaton et al. 2015       |
| ARAF     | ENSG00000078061 | X:47422366-47430856 | +      | I                     | 21.52                               | -                     | no             | -    | Balaton et al. 2015       |
| NDUFB11  | ENSG00000147123 | X:47001715-47004078 | -      | I                     | 54.46                               | -                     | no             | -    | Balaton et al. 2015       |
| NLGN4X   | ENSG00000146938 | X:5810857-6069507   | -      | Mostly E              | 0.2674                              | Y homolog             | no             | -    | Balaton et al. 2015       |
| NROB1    | ENSG00000169297 | X:30322695-30327480 | -      | I                     | 0.07369                             | Y pseudogene          | no             | -    | Balaton et al. 2015       |
| NUDT10   | ENSG00000122824 | X:51075817-51079091 | +      | I                     | 1.814                               | -                     | no             | -    | Balaton et al. 2015       |
| NUDT11   | ENSG00000196368 | X:51234600-51239296 | -      | I                     | 1.929                               | -                     | no             | -    | Balaton et al. 2015       |

|          |                 |                     |   |            |          |              |    |   |                     |
|----------|-----------------|---------------------|---|------------|----------|--------------|----|---|---------------------|
| NYX      | ENSG00000188937 | X:41307142-41334152 | + | I          | 0        | Y pseudogene | no | - | Balaton et al. 2015 |
| OFD1     | ENSG00000046651 | X:13753190-13787227 | + | Mostly E   | 5.859    | Y pseudogene | no | - | Balaton et al. 2015 |
| OTC      | ENSG00000036473 | X:38211949-38280335 | + | I          | 0.08684  | -            | no | - | Balaton et al. 2015 |
| OTUD5    | ENSG00000068308 | X:48780450-48814832 | - | I          | 23.5     | -            | no | - | Balaton et al. 2015 |
| ARHGAP6  | ENSG00000047648 | X:11156982-11445715 | - | Mostly I   | 2.977    | Y pseudogene | no | - | Balaton et al. 2015 |
| PAGE1    | ENSG00000068985 | X:49452143-49459373 | - | No call    | 0        | -            | no | - | Balaton et al. 2015 |
| PAGE2    | ENSG00000234068 | X:55116453-55119164 | + | No call    | 0        | -            | no | - | Balaton et al. 2015 |
| PAGE3    | ENSG00000204279 | X:55284938-55290336 | - | No call    | 0        | -            | no | - | Balaton et al. 2015 |
| PAGE4    | ENSG00000101951 | X:49595031-49598465 | + | No call    | 0        | -            | no | - | Balaton et al. 2015 |
| PAGE5    | ENSG00000158639 | X:55247815-55250436 | + | No call    | 0        | -            | no | - | Balaton et al. 2015 |
| PCSK1N   | ENSG00000102109 | X:48689669-48693934 | - | I          | 0.4771   | -            | no | - | Balaton et al. 2015 |
| PCYT1B   | ENSG00000102230 | X:24580409-24690749 | - | I          | 0.1175   | -            | no | - | Balaton et al. 2015 |
| PDHA1    | ENSG00000131828 | X:19362155-19377771 | + | I          | 13.55    | -            | no | - | Balaton et al. 2015 |
| PDK3     | ENSG00000067992 | X:24483572-24557281 | + | I          | 8.612    | Y pseudogene | no | - | Balaton et al. 2015 |
| ARSD     | ENSG00000006756 | X:2825311-2847316   | - | Mostly E   | 3.108    | Y pseudogene | no | - | Balaton et al. 2015 |
| PKFB1    | ENSG00000158571 | X:54959835-55020440 | - | Discordant | 0.05055  | -            | no | - | Balaton et al. 2015 |
| PHEX     | ENSG00000102174 | X:22051123-22266070 | + | VE         | 0.09849  | Y pseudogene | no | - | Balaton et al. 2015 |
| PHF8     | ENSG00000172943 | X:53965590-54071323 | - | I          | 5.737    | -            | no | - | Balaton et al. 2015 |
| PIGA     | ENSG00000165195 | X:15339627-15350052 | - | I          | 2.354    | -            | no | - | Balaton et al. 2015 |
| PIM2     | ENSG00000102096 | X:48771407-48776111 | - | I          | 3.03     | -            | no | - | Balaton et al. 2015 |
| PIR      | ENSG00000087842 | X:15403125-15509380 | - | Discordant | 6.254    | -            | no | - | Balaton et al. 2015 |
| PLP2     | ENSG00000102007 | X:49028347-49031043 | + | I          | 156.5    | -            | no | - | Balaton et al. 2015 |
| PNPLA4   | ENSG00000006757 | X:7868726-7894160   | - | E          | 1.957    | Y pseudogene | no | - | Balaton et al. 2015 |
| POLA1    | ENSG00000101868 | X:24712078-25014067 | + | I          | 2.033    | Y pseudogene | no | - | Balaton et al. 2015 |
| PORCN    | ENSG00000102312 | X:48369759-48378864 | + | Mostly I   | 5.671    | -            | no | - | Balaton et al. 2015 |
| ARSE     | ENSG00000157399 | X:2852872-2878441   | - | Mostly VE  | 0.5414   | Y pseudogene | no | - | Balaton et al. 2015 |
| PPP1R2P9 | ENSG00000102055 | X:42636721-42637330 | - | No call    | 0        | -            | no | - | Balaton et al. 2015 |
| PPP1R3F  | ENSG00000049769 | X:49137899-49143552 | + | I          | 2.319    | Y pseudogene | no | - | Balaton et al. 2015 |
| PQB1     | ENSG00000102103 | X:48755792-48760361 | + | Mostly I   | 21.11    | Y pseudogene | no | - | Balaton et al. 2015 |
| PRAF2    | ENSG00000243279 | X:48929527-48931646 | - | I          | 33.66    | -            | no | - | Balaton et al. 2015 |
| PRDX4    | ENSG00000123131 | X:23685687-23704452 | + | I          | 29.11    | -            | no | - | Balaton et al. 2015 |
| PRICKLE3 | ENSG00000012211 | X:49032021-49040294 | - | I          | 3.72     | -            | no | - | Balaton et al. 2015 |
| PRKX     | ENSG00000183943 | X:3530240-3631294   | - | E          | 1.573    | Y pseudogene | no | - | Balaton et al. 2015 |
| PRPS2    | ENSG00000101911 | X:12809616-12840915 | + | I          | 6.364    | -            | no | - | Balaton et al. 2015 |
| PRRG1    | ENSG00000130962 | X:37265502-37312874 | + | Mostly I   | 2.108    | -            | no | - | Balaton et al. 2015 |
| ARSF     | ENSG00000062096 | X:2986141-3030597   | + | No call    | 0        | Y pseudogene | no | - | Balaton et al. 2015 |
| PTCHD1   | ENSG00000165186 | X:23352992-23412302 | + | Discordant | 0.1065   | Y pseudogene | no | - | Balaton et al. 2015 |
| RAB9A    | ENSG00000123595 | X:13726865-13727471 | + | Mostly E   | 9.465    | Y pseudogene | no | - | Balaton et al. 2015 |
| RAI2     | ENSG00000131831 | X:17818537-17820130 | - | I          | 18.99    | Y pseudogene | no | - | Balaton et al. 2015 |
| RBBP7    | ENSG00000102054 | X:16863157-16887764 | - | Mostly E   | 36.21    | Y pseudogene | no | - | Balaton et al. 2015 |
| RBM10    | ENSG00000182872 | X:47006880-47045998 | + | I          | 16.59    | -            | no | - | Balaton et al. 2015 |
| REPS2    | ENSG00000169891 | X:16964984-17165604 | + | Discordant | 1.153    | Y pseudogene | no | - | Balaton et al. 2015 |
| RGN      | ENSG00000130988 | X:46940702-46952346 | + | I          | 8.734    | Y pseudogene | no | - | Balaton et al. 2015 |
| RIBC1    | ENSG00000158423 | X:53453224-53457936 | + | Discordant | 0.2786   | -            | no | - | Balaton et al. 2015 |
| RP2      | ENSG00000102218 | X:46696535-46739204 | + | I          | 3.092    | -            | no | - | Balaton et al. 2015 |
| ARSH     | ENSG00000205667 | X:2924653-2951426   | + | E          | 0        | Y pseudogene | no | - | Balaton et al. 2015 |
| RPGR     | ENSG00000156313 | X:38128878-38186620 | - | I          | 1.333    | -            | no | - | Balaton et al. 2015 |
| RPS6KA3  | ENSG00000177189 | X:20173515-20284750 | - | I          | 6.236    | Y pseudogene | no | - | Balaton et al. 2015 |
| RRAGB    | ENSG00000083750 | X:55744760-55784776 | + | Mostly I   | 6.93     | -            | no | - | Balaton et al. 2015 |
| RS1      | ENSG00000102104 | X:18660123-18690188 | - | Discordant | 0.02515  | -            | no | - | Balaton et al. 2015 |
| SAT1     | ENSG00000130066 | X:23801468-23803973 | + | I          | 111.4    | -            | no | - | Balaton et al. 2015 |
| SCML1    | ENSG00000047634 | X:17768073-17771512 | + | I          | 5.658    | -            | no | - | Balaton et al. 2015 |
| SCML2    | ENSG00000102098 | X:18259370-18352191 | - | Mostly I   | 0.7291   | Y pseudogene | no | - | Balaton et al. 2015 |
| SH3BP1   | ENSG00000147010 | X:19554534-19817802 | - | Mostly I   | 3.876    | -            | no | - | Balaton et al. 2015 |
| SHROOM2  | ENSG00000146950 | X:9900818-9914977   | + | Mostly VE  | 0.1019   | Y pseudogene | no | - | Balaton et al. 2015 |
| SLC35A2  | ENSG00000102100 | X:48761866-48768913 | - | I          | 5.188    | Y pseudogene | no | - | Balaton et al. 2015 |
| ARX      | ENSG00000004848 | X:25022786-25033854 | - | No call    | 0        | -            | no | - | Balaton et al. 2015 |
| SLC38A5  | ENSG00000017483 | X:48317318-48326311 | - | I          | 1.633    | -            | no | - | Balaton et al. 2015 |
| SLC9A7   | ENSG00000065923 | X:46466386-46618464 | - | I          | 0.4142   | -            | no | - | Balaton et al. 2015 |
| SMC1A    | ENSG00000072501 | X:53407023-53448887 | - | Mostly E   | 7.624    | Y pseudogene | no | - | Balaton et al. 2015 |
| SMPX     | ENSG00000091482 | X:21755680-21772408 | - | I          | 1.259    | Y pseudogene | no | - | Balaton et al. 2015 |
| SMS      | ENSG00000102172 | X:21958942-22012469 | + | I          | 21.7     | -            | no | - | Balaton et al. 2015 |
| SPACA5   | ENSG00000171489 | X:47867200-47869042 | + | Mostly I   | 0        | -            | no | - | Balaton et al. 2015 |
| SPANXN5  | ENSG00000204363 | X:52825527-52826388 | - | No call    | 0        | -            | no | - | Balaton et al. 2015 |
| SPIN2A   | ENSG00000147059 | X:57162253-57163030 | - | I          | 0.09364  | -            | no | - | Balaton et al. 2015 |
| SPIN2B   | ENSG00000186787 | X:57146285-57147062 | - | Mostly I   | 4.221    | -            | no | - | Balaton et al. 2015 |
| SPIN3    | ENSG00000204271 | X:57020603-57021380 | - | Mostly I   | 2.244    | -            | no | - | Balaton et al. 2015 |
| ASB11    | ENSG00000165192 | X:15301626-15332608 | - | VE         | 0.007965 | Y pseudogene | no | - | Balaton et al. 2015 |
| SRPX     | ENSG00000101955 | X:38008963-38080045 | - | I          | 23.72    | -            | no | - | Balaton et al. 2015 |
| SSX1     | ENSG00000126752 | X:48116676-48125822 | + | No call    | 0        | pseudogene   | no | - | Balaton et al. 2015 |
| SSX2     | ENSG00000241476 | X:5272037-52734799  | - | No call    | 0        | pseudogene   | no | - | Balaton et al. 2015 |
| SSX3     | ENSG00000165584 | X:48206938-48214684 | - | No call    | 0        | pseudogene   | no | - | Balaton et al. 2015 |
| SSX4     | ENSG00000204645 | X:48243494-48251411 | + | No call    | 0        | pseudogene   | no | - | Balaton et al. 2015 |
| SSX4B    | ENSG00000198946 | X:48243494-48251411 | + | No call    | 0        | pseudogene   | no | - | Balaton et al. 2015 |
| SSX5     | ENSG00000165583 | X:48047066-48054794 | - | No call    | 0        | pseudogene   | no | - | Balaton et al. 2015 |
| SSX7     | ENSG00000187754 | X:52674492-52682522 | - | No call    | 0        | pseudogene   | no | - | Balaton et al. 2015 |
| SSX8     | ENSG00000157965 | X:52662998-52662998 | + | No call    | 0        | pseudogene   | no | - | Balaton et al. 2015 |
| SSX9     | ENSG00000204648 | X:48165614-48165614 | - | No call    | 0        | pseudogene   | no | - | Balaton et al. 2015 |
| ASB9     | ENSG00000102048 | X:15262627-15287996 | - | I          | 0.2425   | -            | no | - | Balaton et al. 2015 |
| STS      | ENSG00000101846 | X:7137716-7268302   | + | E          | 4.595    | Y pseudogene | no | - | Balaton et al. 2015 |
| SUV39H1  | ENSG00000101945 | X:48554210-48565961 | + | I          | 1.484    | -            | no | - | Balaton et al. 2015 |
| SYAP1    | ENSG00000169895 | X:16737847-16778482 | + | E          | 6.311    | Y pseudogene | no | - | Balaton et al. 2015 |
| SYN1     | ENSG00000008056 | X:47432262-47479127 | - | Mostly I   | 0.7171   | Y pseudogene | no | - | Balaton et al. 2015 |

|         |                 |                     |   |            |          |              |    |   |                     |
|---------|-----------------|---------------------|---|------------|----------|--------------|----|---|---------------------|
| SYP     | ENSG00000102003 | X:49047893-49056645 | - | I          | 2.096    | -            | no | - | Balaton et al. 2015 |
| SYTL5   | ENSG00000147041 | X:37893142-37985983 | + | I          | 0.008209 | Y pseudogene | no | - | Balaton et al. 2015 |
| TAB3    | ENSG00000157625 | X:30849543-30877705 | - | I          | 2.106    | Y pseudogene | no | - | Balaton et al. 2015 |
| TBC1D25 | ENSG00000068354 | X:48398185-48419363 | + | I          | 5.927    | Y pseudogene | no | - | Balaton et al. 2015 |
| TBL1X   | ENSG00000101849 | X:9621626-9684286   | + | Discordant | 10.36    | Y homolog    | no | - | Balaton et al. 2015 |
| ATP6AP2 | ENSG00000182220 | X:40440317-40465007 | + | Mostly I   | 72.61    | Y pseudogene | no | - | Balaton et al. 2015 |
| TFE3    | ENSG00000068323 | X:48887668-48896850 | - | Mostly I   | 32.52    | -            | no | - | Balaton et al. 2015 |
| TIMM17B | ENSG00000126768 | X:48751011-48755032 | - | Mostly I   | 12.29    | -            | no | - | Balaton et al. 2015 |
| TLR7    | ENSG00000196664 | X:12885697-12906777 | + | I          | 0.2005   | Y pseudogene | no | - | Balaton et al. 2015 |
| TLR8    | ENSG00000101916 | X:12928504-12940285 | + | No call    | 0.3294   | Y pseudogene | no | - | Balaton et al. 2015 |
| TMEM27  | ENSG00000147003 | X:15646093-15682898 | - | Discordant | 0.1118   | Y pseudogene | no | - | Balaton et al. 2015 |
| TMEM47  | ENSG00000147027 | X:34648429-34675146 | - | I          | 77.65    | -            | no | - | Balaton et al. 2015 |
| TMSB4X  | ENSG00000205542 | X:12994380-12994930 | + | No call    | 860.3    | Y homolog    | no | - | Balaton et al. 2015 |
| TRO     | ENSG00000067445 | X:54948679-54957453 | + | Mostly I   | 6.451    | Y pseudogene | no | - | Balaton et al. 2015 |
| ATXN3L  | ENSG00000123594 | X:13336985-13338053 | - | No call    | 0        | -            | no | - | Balaton et al. 2015 |
| TSPAN7  | ENSG00000156298 | X:38420799-38546921 | + | Mostly I   | 10.71    | -            | no | - | Balaton et al. 2015 |
| TSPYL2  | ENSG00000184205 | X:53111680-53117121 | + | I          | 74.52    | Y homolog    | no | - | Balaton et al. 2015 |
| TSR2    | ENSG00000158526 | X:54466854-54470983 | + | I          | 35.62    | -            | no | - | Balaton et al. 2015 |
| TXLNG   | ENSG00000086712 | X:16804610-16859889 | + | E          | 4.382    | Y homolog    | no | - | Balaton et al. 2015 |
| UBQLN2  | ENSG00000188021 | X:56590306-56592181 | + | I          | 14.35    | Y pseudogene | no | - | Balaton et al. 2015 |
| USP51   | ENSG00000247746 | X:55513236-55515372 | - | I          | 0.4558   | -            | no | - | Balaton et al. 2015 |
| USP9X   | ENSG00000124486 | X:40982881-41091777 | + | Mostly E   | 10.44    | Y homolog    | no | - | Balaton et al. 2015 |
| UXT     | ENSG00000126756 | X:47511240-47518326 | - | I          | 43.66    | -            | no | - | Balaton et al. 2015 |
| BCOR    | ENSG00000183337 | X:39911361-39937182 | - | Mostly I   | 6.959    | Y pseudogene | no | - | Balaton et al. 2015 |
| VCX2    | ENSG00000177504 | X:8138072-8138684   | - | No call    | 0        | -            | no | - | Balaton et al. 2015 |
| VCX3A   | ENSG00000169059 | X:6451785-6452538   | - | No call    | 0        | -            | no | - | Balaton et al. 2015 |
| VCX3B   | ENSG00000205642 | X:8433491-8434424   | + | No call    | 0        | -            | no | - | Balaton et al. 2015 |
| VENTXP1 | ENSG00000259849 | X:26579169-26579169 | + | E          | 0        | -            | no | - | Balaton et al. 2015 |
| WAS     | ENSG00000015285 | X:48542242-48549553 | + | VE         | 2.845    | Y pseudogene | no | - | Balaton et al. 2015 |
| WDR13   | ENSG00000101940 | X:48457339-48463420 | + | I          | 22.88    | -            | no | - | Balaton et al. 2015 |
| WDR45   | ENSG00000196998 | X:48932461-48935754 | - | I          | 19.17    | -            | no | - | Balaton et al. 2015 |
| WNK3    | ENSG00000196632 | X:54224756-54360106 | - | I          | 0.503    | -            | no | - | Balaton et al. 2015 |
| WWC3    | ENSG00000047644 | X:10031578-10109541 | + | Mostly I   | 15.16    | Y pseudogene | no | - | Balaton et al. 2015 |
| XAGE2   | ENSG00000185751 | X:52113157-52118734 | + | No call    | 0        | -            | no | - | Balaton et al. 2015 |
| BEND2   | ENSG00000177324 | X:18189094-18238870 | - | VE         | 0        | Y pseudogene | no | - | Balaton et al. 2015 |
| XAGE3   | ENSG00000171402 | X:52891646-52896164 | - | No call    | 0        | -            | no | - | Balaton et al. 2015 |
| XAGE5   | ENSG00000171405 | X:52841590-52847237 | + | No call    | 0        | -            | no | - | Balaton et al. 2015 |
| XK      | ENSG00000047597 | X:37545214-37587715 | + | I          | 0.4991   | Y pseudogene | no | - | Balaton et al. 2015 |
| ZFX     | ENSG00000005889 | X:24190859-24229493 | + | E          | 3.46     | Y homolog    | no | - | Balaton et al. 2015 |
| ZNF157  | ENSG00000147117 | X:47230067-47272993 | + | Discordant | 0.07125  | -            | no | - | Balaton et al. 2015 |
| ZNF182  | ENSG00000147118 | X:47835565-47862008 | - | I          | 2.809    | -            | no | - | Balaton et al. 2015 |
| ZNF41   | ENSG00000147124 | X:47306828-47315356 | - | I          | 1.753    | Y pseudogene | no | - | Balaton et al. 2015 |
| ZNF630  | ENSG00000221994 | X:47917856-47926274 | - | Mostly I   | 1.573    | Y pseudogene | no | - | Balaton et al. 2015 |
| ZNF645  | ENSG00000175809 | X:22291108-22292386 | + | No call    | 0        | -            | no | - | Balaton et al. 2015 |
| ZNF674  | ENSG00000251192 | X:46359277-46401522 | - | I          | 0.548    | -            | no | - | Balaton et al. 2015 |
| BMP15   | ENSG00000130385 | X:50653783-50659607 | + | No call    | 0        | -            | no | - | Balaton et al. 2015 |
| ZNF81   | ENSG00000197779 | X:47705666-47776031 | + | Mostly I   | 0.7271   | Y pseudogene | no | - | Balaton et al. 2015 |
| ZRSR2   | ENSG00000169249 | X:15808618-15841365 | + | E          | 11.01    | Y pseudogene | no | - | Balaton et al. 2015 |
| ZXDA    | ENSG00000198205 | X:57934454-57936854 | - | I          | 0.9794   | Y pseudogene | no | - | Balaton et al. 2015 |
| ZXDB    | ENSG00000198455 | X:57618481-57620893 | + | I          | 2.612    | -            | no | - | Balaton et al. 2015 |
| CACNA1F | ENSG00000102001 | X:49061596-49089771 | - | I          | 0.05972  | Y pseudogene | no | - | Balaton et al. 2015 |
| CASK    | ENSG00000147044 | X:41379672-41782241 | - | I          | 3.482    | Y pseudogene | no | - | Balaton et al. 2015 |
| CCNB3   | ENSG00000147082 | X:50028163-50094702 | + | Mostly I   | 0.04199  | Y pseudogene | no | - | Balaton et al. 2015 |
| CDK16   | ENSG00000102225 | X:47082494-47088167 | + | Mostly E   | 13.82    | Y pseudogene | no | - | Balaton et al. 2015 |
| CDKL5   | ENSG00000008086 | X:18525216-18671664 | + | Mostly I   | 1.037    | Y pseudogene | no | - | Balaton et al. 2015 |
| CENPV1  | ENSG00000223591 | X:51425447-51425447 | - | No call    | na       | pseudogene   | no | - | Balaton et al. 2015 |
| CFP     | ENSG00000126759 | X:47483673-47489243 | - | I          | 0.8031   | -            | no | - | Balaton et al. 2015 |
| CHST7   | ENSG00000147119 | X:46433366-46434827 | + | I          | 3.535    | Y pseudogene | no | - | Balaton et al. 2015 |
| CLCN4   | ENSG00000073464 | X:10162988-10201624 | + | Mostly I   | 1.005    | -            | no | - | Balaton et al. 2015 |
| CLCN5   | ENSG00000171365 | X:49834580-49856876 | + | I          | 1.082    | Y pseudogene | no | - | Balaton et al. 2015 |
| CNKSR2  | ENSG00000149970 | X:21393015-21670639 | + | Mostly I   | 0.3111   | Y pseudogene | no | - | Balaton et al. 2015 |
| CXXC1P1 | ENSG00000187893 | X:47596027-47596027 | + | No call    | 0        | -            | no | - | Balaton et al. 2015 |
| CYBB    | ENSG00000165168 | X:37639330-37670170 | + | I          | 4.286    | Y pseudogene | no | - | Balaton et al. 2015 |
| DCAF8L1 | ENSG00000226372 | X:27997648-27999451 | - | No call    | 0        | -            | no | - | Balaton et al. 2015 |
| DCAF8L2 | ENSG00000189186 | X:27765012-27766908 | + | No call    | 0        | -            | no | - | Balaton et al. 2015 |
| DDX3X   | ENSG00000215301 | X:41193505-41206972 | + | E          | 42.67    | Y homolog    | no | - | Balaton et al. 2015 |
| DDX53   | ENSG00000184735 | X:23018174-23020070 | + | No call    | 0        | Y pseudogene | no | - | Balaton et al. 2015 |
| DMD     | ENSG00000198947 | X:31140035-33357382 | - | I          | 8.586    | Y pseudogene | no | - | Balaton et al. 2015 |
| DUSP21  | ENSG00000189037 | X:44703378-44703951 | + | No call    | 0        | -            | no | - | Balaton et al. 2015 |
| DYNLT3  | ENSG00000165169 | X:37699827-37706763 | - | I          | 19.7     | -            | no | - | Balaton et al. 2015 |
| EBP     | ENSG00000147155 | X:48382159-48386845 | + | Mostly I   | 4.078    | -            | no | - | Balaton et al. 2015 |
| EFHC2   | ENSG00000183690 | X:44008040-44202834 | - | Discordant | 0.1048   | -            | no | - | Balaton et al. 2015 |
| EGLF6   | ENSG00000198759 | X:13587980-13651214 | + | I          | 0.05223  | Y pseudogene | no | - | Balaton et al. 2015 |
| E1F1AX  | ENSG00000173674 | X:20146423-20159758 | - | E          | 14.81    | Y homolog    | no | - | Balaton et al. 2015 |
| E1F2S3  | ENSG00000130741 | X:24073085-24094902 | + | E          | 29.13    | Y pseudogene | no | - | Balaton et al. 2015 |
| ELK1    | ENSG00000126767 | X:47496227-47500840 | - | I          | 7.936    | -            | no | - | Balaton et al. 2015 |
| FAAH2   | ENSG00000165591 | X:57313258-57515365 | + | I          | 0.1474   | -            | no | - | Balaton et al. 2015 |
| FAM104B | ENSG00000182518 | X:55170211-55187589 | - | I          | 2.956    | -            | no | - | Balaton et al. 2015 |
| FAM120C | ENSG00000184083 | X:54099656-54209631 | - | I          | 1.319    | -            | no | - | Balaton et al. 2015 |
| FAM156A | ENSG00000182646 | X:52977154-52977796 | - | I          | 0.6475   | -            | no | - | Balaton et al. 2015 |
| FAM47A  | ENSG00000185448 | X:34148019-34150395 | - | No call    | 0        | -            | no | - | Balaton et al. 2015 |
| FAM47B  | ENSG00000189132 | X:34960948-34962886 | + | No call    | 0        | -            | no | - | Balaton et al. 2015 |
| FAM47C  | ENSG00000198173 | X:37026483-37029591 | + | No call    | 0        | -            | no | - | Balaton et al. 2015 |

|         |                 |                     |   |            |          |              |    |   |                     |
|---------|-----------------|---------------------|---|------------|----------|--------------|----|---|---------------------|
| FAM9A   | ENSG00000183304 | X:8759351-8768212   | - | No call    | 0        | -            | no | - | Balaton et al. 2015 |
| FAM9B   | ENSG00000177138 | X:8993555-9001027   | - | No call    | 0        | -            | no | - | Balaton et al. 2015 |
| ACE2    | ENSG00000130234 | X:15580027-15619034 | - | E          | 0.08828  | Y pseudogene | no | - | Balaton et al. 2015 |
| FANCB   | ENSG00000181544 | X:14861688-14883632 | - | I          | 0.1498   | Y pseudogene | no | - | Balaton et al. 2015 |
| FGD1    | ENSG00000102302 | X:54472541-54521865 | - | Mostly I   | 4.112    | -            | no | - | Balaton et al. 2015 |
| FOXP3   | ENSG00000049768 | X:49107794-49114962 | - | I          | 0.07184  | Y pseudogene | no | - | Balaton et al. 2015 |
| FOXR2   | ENSG00000189299 | X:55650144-55651080 | + | No call    | 0        | -            | no | - | Balaton et al. 2015 |
| FRMPD4  | ENSG00000169933 | X:12157090-12738652 | + | Discordant | 0.003936 | Y pseudogene | no | - | Balaton et al. 2015 |
| FTHL17  | ENSG00000132446 | X:31089518-31090070 | - | No call    | 0        | -            | no | - | Balaton et al. 2015 |
| FTSJ1   | ENSG00000068438 | X:48337501-48341406 | + | I          | 10.96    | Y pseudogene | no | - | Balaton et al. 2015 |
| FUNDC1  | ENSG00000069509 | X:44383443-44402078 | - | E          | 6.166    | Y pseudogene | no | - | Balaton et al. 2015 |
| GAGE1   | ENSG00000205777 | X:49364777-49370618 | + | No call    | 0        | pseudogene   | no | - | Balaton et al. 2015 |
| GAGE10  | ENSG00000215274 | X:49161338-49176229 | + | No call    | 0.05566  | pseudogene   | no | - | Balaton et al. 2015 |
| ACOT9   | ENSG00000123130 | X:23722010-23761261 | - | I          | 12.07    | -            | no | - | Balaton et al. 2015 |
| GAGE12B | ENSG00000236737 | X:49326599-49332717 | + | No call    | 0        | pseudogene   | no | - | Balaton et al. 2015 |
| GAGE12D | ENSG00000227488 | X:49297934-49304050 | + | No call    | 0        | pseudogene   | no | - | Balaton et al. 2015 |
| GAGE12E | ENSG00000216649 | X:49336157-49342266 | + | No call    | 0        | pseudogene   | no | - | Balaton et al. 2015 |
| GAGE12F | ENSG00000236362 | X:49297934-49304050 | + | No call    | 0        | pseudogene   | no | - | Balaton et al. 2015 |
| GAGE12I | ENSG00000241465 | X:49217770-49223849 | + | No call    | 0        | pseudogene   | no | - | Balaton et al. 2015 |
| GAGE12J | ENSG00000224659 | X:49179672-49294494 | + | No call    | 0        | pseudogene   | no | - | Balaton et al. 2015 |
| GAGE13  | ENSG00000237597 | X:49189215-49294494 | + | No call    | 0        | pseudogene   | no | - | Balaton et al. 2015 |
| GAGE2A  | ENSG00000189064 | X:49198718-49313606 | + | No call    | 0        | pseudogene   | no | - | Balaton et al. 2015 |
| GAGE2C  | ENSG00000236249 | X:49198718-49214326 | + | No call    | 0        | pseudogene   | no | - | Balaton et al. 2015 |
| GAGE2D  | ENSG00000240257 | X:49198718-49223849 | + | No call    | 0        | pseudogene   | no | - | Balaton et al. 2015 |
| AKAP4   | ENSG00000147081 | X:49955602-49965540 | - | I          | 0.008884 | Y pseudogene | no | - | Balaton et al. 2015 |
| GAGE2E  | ENSG00000205775 | X:49236830-49294494 | + | No call    | 0        | pseudogene   | no | - | Balaton et al. 2015 |
| GATA1   | ENSG00000102145 | X:48649516-48652571 | + | I          | 0.05679  | Y pseudogene | no | - | Balaton et al. 2015 |
| GK      | ENSG00000198814 | X:30671654-30746859 | + | I          | 0.8608   | -            | no | - | Balaton et al. 2015 |
| GLD5    | ENSG00000171433 | X:48620194-48631851 | + | No call    | 0        | -            | no | - | Balaton et al. 2015 |
| GLRA2   | ENSG00000101958 | X:14548179-14748607 | + | Mostly I   | 0        | Y pseudogene | no | - | Balaton et al. 2015 |
| GNL3L   | ENSG00000130119 | X:54558999-54587035 | + | Mostly I   | 2.018    | Y pseudogene | no | - | Balaton et al. 2015 |
| KANTR   | ENSG00000232593 | X:53177190-53177190 | + | na         | na       | -            | no | - | na                  |
| CENPVL2 | ENSG00000283093 | X:51425447-51425447 | - | No call    | na       | pseudogene   | no | - | na                  |
| UBE2E4P | ENSG00000233247 | X:14263545-14263545 | + | No call    | na       | pseudogene   | no | - | na                  |
| ADGRG2  | ENSG00000173698 | X:19008981-19086952 | - | No call    | na       | -            | no | - | na                  |
| CFAP47  | ENSG00000165164 | X:35937916-36403121 | + | No call    | na       | -            | no | - | na                  |
| CLDN34  | ENSG00000234469 | X:9935397-9936042   | + | No call    | na       | -            | no | - | na                  |
| HYPM    | ENSG00000187516 | X:37850092-37850446 | + | No call    | na       | -            | no | - | na                  |
| JADE3   | ENSG00000102221 | X:46844295-46918479 | + | No call    | na       | -            | no | - | na                  |
| MED14OS | ENSG00000234636 | X:40594700-40597510 | + | No call    | na       | -            | no | - | na                  |
| NBDY    | ENSG00000204272 | X:56755786-56755993 | + | No call    | na       | -            | no | - | na                  |
| NLRP2B  | ENSG00000215174 | X:57706555-57706693 | - | No call    | na       | -            | no | - | na                  |
| VEGFD   | ENSG00000165197 | X:15364254-15402068 | - | No call    | na       | -            | no | - | na                  |
| GAGE12C | ENSG00000237671 | X:49297934-49304050 | + | No call    | 0        | pseudogene   | no | - | na                  |
| GAGE12G | ENSG00000215269 | X:49217770-49223849 | + | No call    | 0        | pseudogene   | no | - | na                  |
| GAGE12H | ENSG00000224902 | X:49297934-49304050 | + | No call    | 0        | pseudogene   | no | - | na                  |
| MAGEB17 | ENSG00000182798 | X:16188505-16189516 | + | No call    | 0        | pseudogene   | no | - | na                  |
| MPC1L   | ENSG00000238205 | X:40482817-40483228 | + | No call    | 0        | pseudogene   | no | - | na                  |
| SSX2B   | ENSG00000157950 | X:52727037-52734799 | - | No call    | 0        | pseudogene   | no | - | na                  |
| SSX6    | ENSG00000171483 | X:47980068-47980068 | + | No call    | 0        | pseudogene   | no | - | na                  |
| VCX     | ENSG00000182583 | X:7811244-7812057   | + | No call    | 0        | Y homolog    | no | - | na                  |
| FTH1P18 | ENSG00000243048 | X:37061095-37061761 | - | No call    | 0        | -            | no | - | na                  |
| SPACA5B | ENSG00000171478 | X:47867200-47869042 | + | No call    | 0        | -            | no | - | na                  |
| XAGE1B  | ENSG00000204382 | X:52240503-52243866 | + | No call    | 0        | -            | no | - | na                  |
| XAGE1E  | ENSG00000204375 | X:52240503-52243866 | + | No call    | 0        | -            | no | - | na                  |

\*hg19 location

X inactivation status: E=escape, VE variable escape, I=inactivated
